# Supplementary material
Source: PubMed Central journal article supplement (PMC11028154)
Supplement: 262_2017_2055_MOESM1_ESM.pdf [file 262_2017_2055_MOESM1_ESM.pdf]

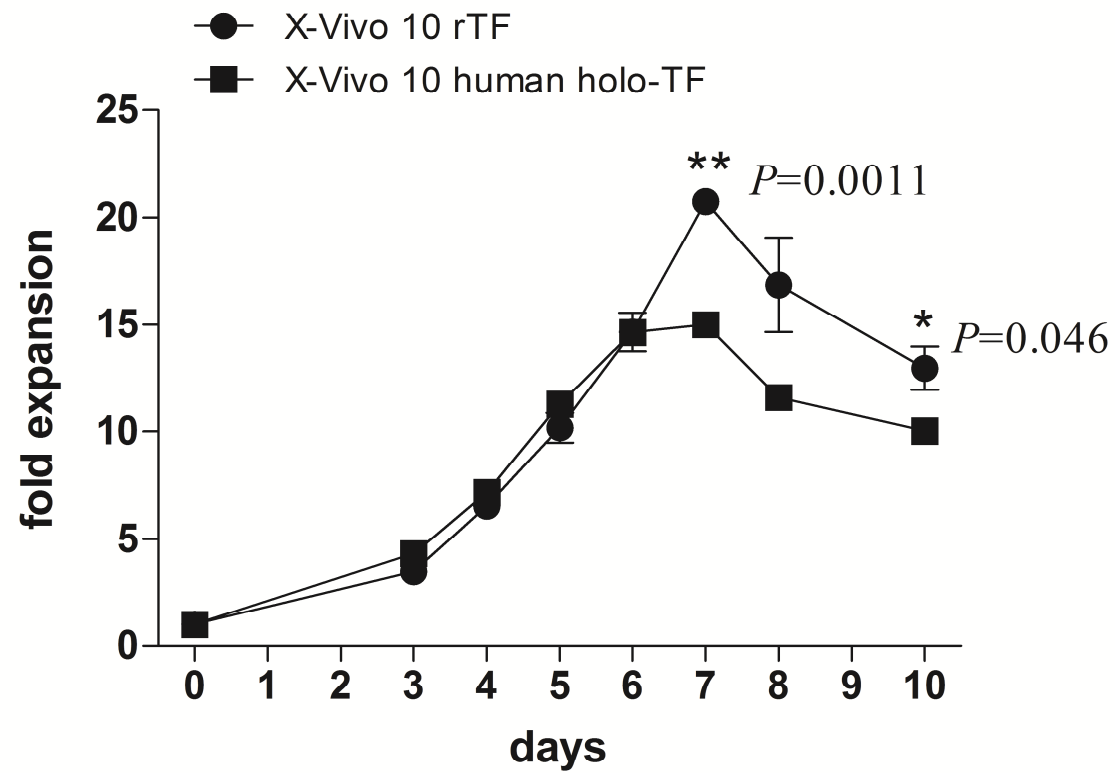

**Supplementary figure 1 Comparison of NK-92/5.28.z cell growth in two variants of X-Vivo 10 media containing transferrin from two different sources**  
 Black dots represent proliferation rates in X-Vivo 10 medium containing recombinant transferrin at indicated time points. Black squares represent X-Vivo 10 containing human holo-transferrin.

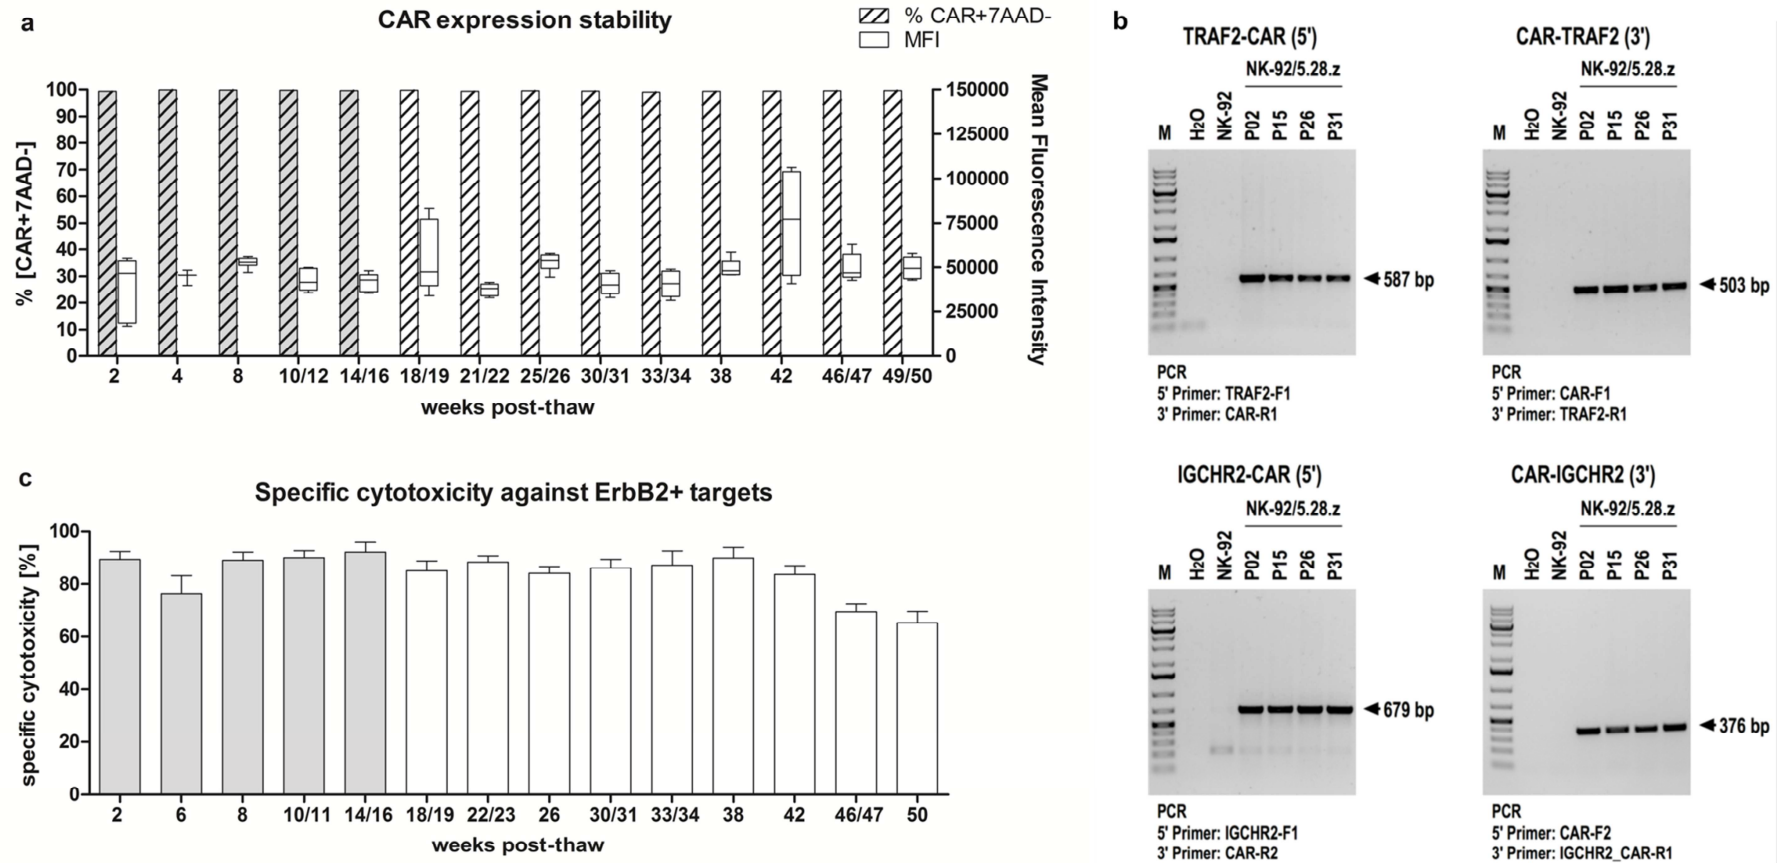

**Supplementary figure 2 Stability of transgene (CAR) expression and functionality of NK-92/5.28.z cells in a large-scale long-term maintenance culture**

**(a)** CAR expression analysis was performed up to week 50 with the cells derived from 3 representative vials thawed from master cell bank. Data are presented as a % of CAR+7AAD- cells (hatched bars) and as a MFI (box with whiskers: min to max; Mean  $\pm$  SEM). **(b)** PCR analysis of vector integration sites in cell clone NK-92/5.28.z (#78) at different time points of continuous expansion. The genomic DNA was isolated after 1 week (passage 2, P2), 7.5 weeks (passage 15, P15), 13.5 weeks (passage 26, P26) and 16.5 weeks (passage 31, P31). Genomic DNA of unmodified parental NK-92 cells and reactions without addition of genomic DNA (H2O) served as controls. **(c)** Specific cytotoxicity against ErbB2+ targets was tested with the cells derived from 3 representative vials thawed from master cell bank up to week 50 using EuTDA killing assay. Data shown as Mean  $\pm$  SEM. Grey bars shown in the figure a and c represent three-month period of maintenance culture.

**Supplementary table 1** Impact of different serum substitutes in GMP-compliant, albumin containing culture media supplemented with 500 U/ml of IL-2 on NK-92/5.28.z cells proliferation

| Culture medium                                                                                 | Human serum substitute               | Doubling time [h] | Maximal fold expansion | Maximal concentration/ml in batch culture [ $\times 10^5$ ] |
|------------------------------------------------------------------------------------------------|--------------------------------------|-------------------|------------------------|-------------------------------------------------------------|
| X-Vivo 10 w/o Phenol red and Gentamycin containing recombinant Transferrin (Lonza, #BE02-055Q) | 5 % of heat inactivated human plasma | $28.84 \pm 0.5$   | $24.97 \pm 0.65$       | $12.49 \pm 0.32$                                            |
|                                                                                                | 5 % of human platelet lysate 1       | $35.6 \pm 1.38$   | $21.37 \pm 1.01$       | $10.7 \pm 0.52$                                             |
|                                                                                                | 5 % of human platelet lysate 2       | $37.48 \pm 1.89$  | $18.07 \pm 3.04$       | $9.01 \pm 1.52$                                             |
|                                                                                                | serum-free culture w/o acclimation   | $83.11 \pm 3.08$  | $5.3 \pm 0.18$         | $2.65 \pm 0.09$                                             |
|                                                                                                | serum-free culture post-acclimation  | $47.37 \pm 2.75$  | $20.4 \pm 1.71$        | $10.2 \pm 0.85$                                             |
| X-Vivo 10 w/o Phenol red and Gentamycin (Lonza, #BE04-743Q)                                    | 5 % of heat inactivated human plasma | $34.39 \pm 0.63$  | $15 \pm 0.6$           | $7.5 \pm 0.3$                                               |
| CellGro SCGM (CellGenix)                                                                       | 5 % of heat inactivated human plasma | $33.29 \pm 0.2$   | $21.23 \pm 2.34$       | $10.62 \pm 1.17$                                            |
|                                                                                                | serum-free culture                   | $90.97 \pm 5.47$  | $3.03 \pm 0.2$         | $1.52 \pm 0.1$                                              |

Grey field indicates optimal formulation and respective growth parameters. Results shown as Mean  $\pm$  SEM

**Supplementary table 2** Cytokine profile of PMA (50 ng/ml)/Ionomycin (500 ng/ml) stimulated target cells

| Target cell line | Soluble factor | Concentration [pg/ml] |
|------------------|----------------|-----------------------|
| MDA-MB-453       | IL-8           | 9.93 ± 1.2            |
| MDA-MB-468       | IL-6           | 247 ± 30.09           |
|                  | IL-8           | 635 ± 27.53           |
|                  | TNF            | 6.64 ± 2.72           |
| K562             | GM-CSF         | 286.61 ± 76.55        |
|                  | IL-6           | 235.26 ± 64.34        |
|                  | IL-8           | 524.61 (n=1)          |
|                  | TNF            | 311.92 ± 47.92        |

Results shown as Mean ± SEM
